# Supplementary material for: Estimating the Impact of Consecutive Blood Meals on Vector Competence of Aedes albopictus for Chikungunya Virus
Source: MDPI journal article supplement (doi:10.3390/pathogens12060849), 2023-06-20
Supplement: s1 [file s1]

**Table S1. Description of feeding rate and survival rate for *Ae. albopictus* females from the control (only one infectious meal) and second group (exposed to a second non-infectious blood meal).**

| Exposed to blood      | Engorged* | Temperature regime | Survived (4 dpi) | Engorged | Survived (7 dpi) | Survived (10 dpi) |
|-----------------------|-----------|--------------------|------------------|----------|------------------|-------------------|
| <b>Control</b>        |           |                    |                  |          |                  |                   |
| 66                    | 39 (59%)  | CT                 | n/a              | n/a      | 30 (77%)         | -                 |
| 87                    | 44 (51%)  | CT                 | n/a              | n/a      | -                | 25 (57%)          |
| 123                   | 82 (67%)  | FT                 | n/a              | n/a      | 29 (35%)         | -                 |
| 62                    | 40 (65%)  | FT                 | n/a              | n/a      | -                | 31 (78%)          |
| <b>2nd blood meal</b> |           |                    |                  |          |                  |                   |
| 185                   | 105 (57%) | CT                 | 97               | 32 (33%) | 20 (63%)         | -                 |
| 308                   | 221 (71%) | CT                 | 203              | 66 (33%) | -                | 30 (44%)          |
| 255                   | 167 (65%) | FT                 | 140              | 56 (40%) | 30 (54%)         | -                 |
| 250                   | 138 (55%) | FT                 | 128              | 38 (30%) | -                | 30 (79%)          |

\*these totals do not include day 0 females
